# Supplementary material for: Conidia Fusion: A Mechanism for Fungal Adaptation to Nutrient-Poor Habitats
Source: MDPI journal article supplement (doi:10.3390/jof9070755), 2023-07-17
Supplement: s1 [file s1]

**Table S1:** Testing Nematode-trapping fungi

| Species name               | Genera              | Trap structure    | Conidia type          | Strain number |
|----------------------------|---------------------|-------------------|-----------------------|---------------|
| <i>A. arthrobotryoides</i> | <i>Arthrobotrys</i> | Adhesive networks | Arthrobotrys-shaped   | 47            |
| <i>A. botryospora</i>      |                     |                   | Arthrobotrys-shaped   | 15            |
| <i>A. cladodes</i>         |                     |                   | Arthrobotrys-shaped   | 36            |
| <i>A. conoides</i>         |                     |                   | Arthrobotrys-shaped   | 237           |
| <i>A. eryuanensis</i>      |                     |                   | Arthrobotrys-shaped   | 3             |
| <i>A. javanica</i>         |                     |                   | Arthrobotrys-shaped   | 91            |
| <i>A. jindingensis</i>     |                     |                   | Arthrobotrys-shaped   | 2             |
| <i>A. jinpingensis</i>     |                     |                   | Arthrobotrys-shaped   | 2             |
| <i>A. Latispora</i>        |                     |                   | Arthrobotrys-shaped   | 6             |
| <i>A. musiformis</i>       |                     |                   | Arthrobotrys-shaped   | 350           |
| <i>A. oligospora</i>       |                     |                   | Arthrobotrys-shaped   | 457           |
| <i>A. polycephala</i>      |                     |                   | Arthrobotrys-shaped   | 3             |
| <i>A. pyriformis</i>       |                     |                   | Arthrobotrys-shaped   | 2             |
| <i>A. robusta</i>          |                     |                   | Arthrobotrys-shaped   | 1             |
| <i>A. shuifuensis</i>      |                     |                   | Arthrobotrys-shaped   | 3             |
| <i>A. superba</i>          |                     |                   | Arthrobotrys-shaped   | 276           |
| <i>A. tongdianensis</i>    |                     |                   | Arthrobotrys-shaped   | 2             |
| <i>A. vermicola</i>        |                     |                   | Arthrobotrys-shaped   | 82            |
| <i>A. cystosporia</i>      |                     |                   | Monacrosporium-shaped | 8             |
| <i>A. elegans</i>          |                     |                   | Monacrosporium-shaped | 4             |
| <i>A. eudermata</i>        |                     |                   | Monacrosporium-shaped | 43            |
| <i>A. fusiformis</i>       |                     |                   | Monacrosporium-shaped | 1             |
| <i>A. gampsospora</i>      |                     |                   | Monacrosporium-shaped | 3             |
| <i>A. gongshanensis</i>    |                     |                   | Monacrosporium-shaped | 6             |
| <i>A. janus</i>            |                     |                   | Monacrosporium-shaped | 1             |
| <i>A. lanpingensis</i>     |                     |                   | Monacrosporium-shaped | 3             |
| <i>A. longiphora</i>       |                     |                   | Monacrosporium-shaped | 8             |
| <i>A. luquanensis</i>      |                     |                   | Monacrosporium-shaped | 3             |
| <i>A. luzhangensis</i>     |                     |                   | Monacrosporium-shaped | 4             |
| <i>A. megalospora</i>      |                     |                   | Monacrosporium-shaped | 3             |
| <i>A. microscaphoides</i>  |                     |                   | Monacrosporium-shaped | 7             |
| <i>A. obovata</i>          |                     |                   | Monacrosporium-shaped | 27            |
| <i>A. oudemansii</i>       |                     |                   | Monacrosporium-shaped | 8             |
| <i>A. reticulata</i>       |                     |                   | Monacrosporium-shaped | 44            |

|                          |                      |                                           |                       |              |
|--------------------------|----------------------|-------------------------------------------|-----------------------|--------------|
| <i>A. scaphoides</i>     |                      |                                           | Monacrosporium-shaped | 54           |
| <i>A. sinensis</i>       |                      |                                           | Monacrosporium-shaped | 15           |
| <i>A. sphaeroides</i>    |                      |                                           | Monacrosporium-shaped | 49           |
| <i>A. thaumasia</i>      |                      |                                           | Monacrosporium-shaped | 91           |
| <i>A. xiangyunensis</i>  |                      |                                           | Monacrosporium-shaped | 187          |
| <i>A. zhaoyangensis</i>  |                      |                                           | Monacrosporium-shaped | 2            |
| <i>A. uliformis</i>      |                      |                                           | Dactylella-shaped     | 2            |
| <i>Dr. brochopaga</i>    |                      |                                           | Arthrobotrys-shaped   | 3            |
| <i>Dr. dactyloides</i>   |                      |                                           | Arthrobotrys-shaped   | 30           |
| <i>Dr. aphrobrocha</i>   |                      |                                           | Monacrosporium-shaped | 24           |
| <i>Dr. bembicodes</i>    |                      |                                           | Monacrosporium-shaped | 7            |
| <i>Dr. coelobrocha</i>   |                      |                                           | Monacrosporium-shaped | 31           |
| <i>Dr. daliensis</i>     | <i>Drechslerella</i> | Constricting rings                        | Monacrosporium-shaped | 2            |
| <i>Dr. doedycoides</i>   |                      |                                           | Monacrosporium-shaped | 4            |
| <i>Dr. effusa</i>        |                      |                                           | Monacrosporium-shaped | 2            |
| <i>Dr. heterospora</i>   |                      |                                           | Monacrosporium-shaped | 1            |
| <i>Dr. stenobrocha</i>   |                      |                                           | Monacrosporium-shaped | 1            |
| <i>Dr. xiaguanensis</i>  |                      |                                           | Monacrosporium-shaped | 2            |
| <i>Da. cangshanensis</i> |                      |                                           | Monacrosporium-shaped | 4            |
| <i>Da. drechsleri</i>    |                      |                                           | Monacrosporium-shaped | 54           |
| <i>Da. dulongensis</i>   |                      |                                           | Monacrosporium-shaped | 2            |
| <i>Da. ellispsora</i>    |                      | Adhesive knobs                            | Monacrosporium-shaped | 71           |
| <i>Da. multiseptata</i>  |                      |                                           | Monacrosporium-shaped | 1            |
| <i>Da. parvicolla</i>    |                      |                                           | Monacrosporium-shaped | 6            |
| <i>Da. phymatopaga</i>   | <i>Dactylellina</i>  |                                           | Monacrosporium-shaped | 1            |
| <i>Da. yushanensis</i>   |                      |                                           | Monacrosporium-shaped | 5            |
| <i>Da. illaqueata</i>    |                      | Adhesive knobs and non-constricting rings | Monacrosporium-shaped | 1            |
| <i>Da. sichuanensis</i>  |                      |                                           | Monacrosporium-shaped | 7            |
| <i>Da. cionopaga</i>     |                      |                                           | Monacrosporium-shaped | 3            |
| <i>Da. robusta</i>       |                      | Adhesive branches                         | Monacrosporium-shaped | 2            |
| <i>Da. gephyropaga</i>   |                      |                                           | Monacrosporium-shaped | 5            |
| 65 species               | 3 genera             | 5 types of trapping structures            | 3 types of conidia    | 2457 strains |

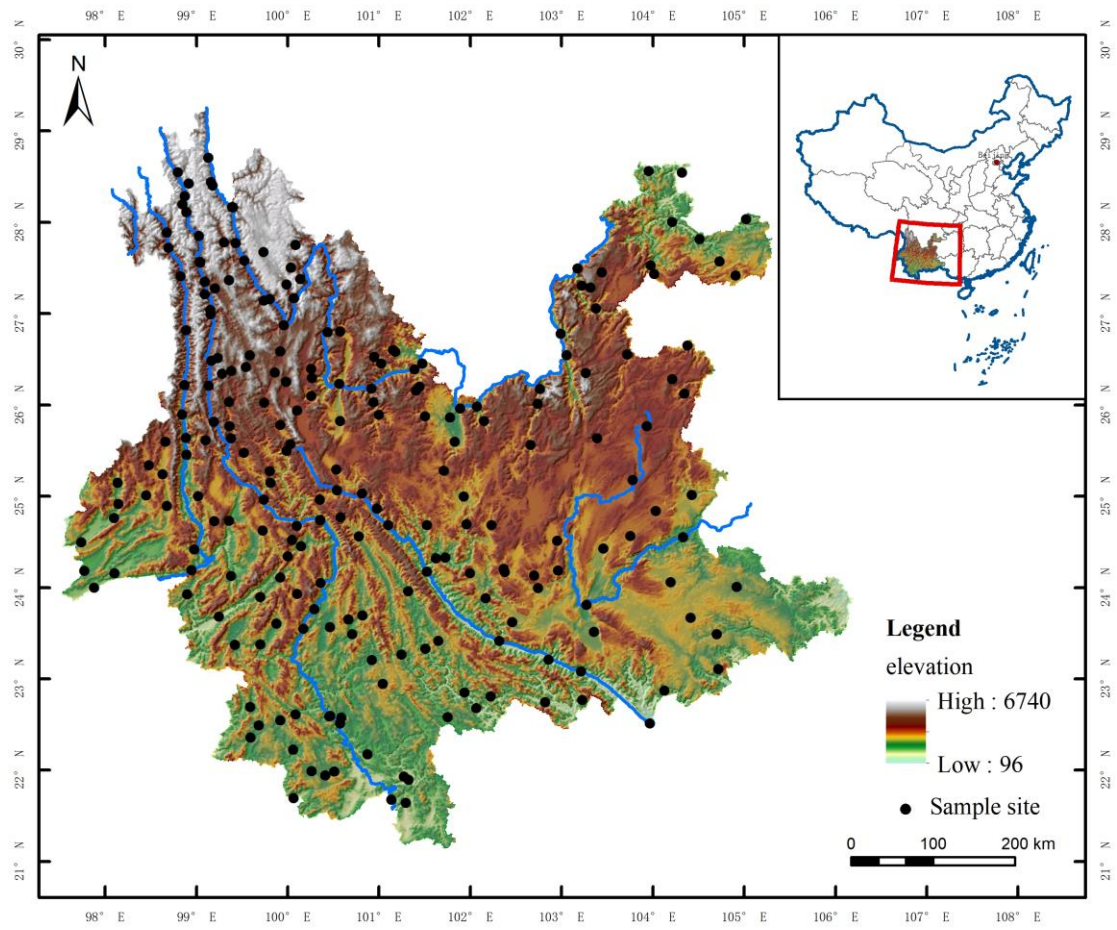

**Figure S1.** The source distribution map of the strains involved in this study.
